# Supplementary material for: The Microbiome and the Gut‐Liver‐Brain Axis for Central Nervous System Clinical Pharmacology: Challenges in Specifying and Integrating In Vitro and In Silico Models
Source: PubMed Central journal article supplement — Clin Pharmacol Ther. 2020 May 29;108(5):929–48. doi: 10.1002/cpt.1870 (PMC7572575; doi:10.1002/cpt.1870), 2020-05-29
Supplement: NIHMS1599017-supplement-Sup_info.pdf [file NIHMS1599017-supplement-Sup_info.pdf]

## SUPPLEMENTARY INFORMATION

### The Microbiome and the Gut-Liver-Brain Axis for CNS Clinical Pharmacology: Challenges in Specifying and Integrating *In Vitro* and *In Silico* Models

Kyle G. Hawkins<sup>1</sup>, Caleb Casolaro<sup>2</sup>, Jacquelyn A. Brown<sup>1,3</sup>, David A. Edwards<sup>4</sup>, John P. Wikswo<sup>1,2,3,5</sup>

<sup>1</sup> Department of Physics and Astronomy, Vanderbilt University, Nashville, TN U.S.A.

<sup>2</sup> Department of Biomedical Engineering, Vanderbilt University, Nashville, TN U.S.A.

<sup>3</sup> Vanderbilt Institute for Integrative Biosystems Research and Education, Vanderbilt University, Nashville, TN U.S.A.

<sup>4</sup> Department of Anesthesiology and Department of Neurological Surgery, Vanderbilt University Medical Center, Nashville, TN U.S.A.

<sup>5</sup> Department of Molecular Physiology and Biophysics, Vanderbilt University, Nashville, TN U.S.A.

Corresponding author: John P. Wikswo  
VU Station B 351807, Nashville, TN 37235-1807  
Tel: (615) 343-4124  
[john.wikswo@vanderbilt.edu](mailto:john.wikswo@vanderbilt.edu)

In a relatively new research field that is growing at the rate of 10,000 research articles a year and is accompanied by broad coverage in the popular press, it is almost impossible to provide a comprehensive review that spans both the historical record and the state-of-the-art. There is also a broad spectrum in the depth of coverage of the various topics connected by this review. We have identified a large number of articles that should inform the reader about the intersection of the human microbiome, clinical pharmacology, environmental toxicology, and the central nervous system. Given the reasonable restriction in the number of references allowed, we have chosen to present many points in the main article with minimal references, and provide, as appropriate, parallel text in this Supplementary Information with more complete references. Hence, this supplement is presented as a complementary guide to reading in greater depth and a “review of the reviews,” mixed with selections from primary literature. We have attempted to minimize redundancy between the main article and this supplement, but some has been necessary to maintain the context of the citations in both places. We also apologize to the many researchers whose work we were unable to highlight.

## INTRODUCTION

Several articles provide additional information about metabotypes<sup>1, 2, 3</sup>, other metabolomic profiles<sup>4, 5, 6</sup> and the development of high-dimensional biomarkers.<sup>4, 7, 8</sup>

With regard to the microbiome and human disease,<sup>9, 10</sup> there are a rapidly growing number of reports of differences between the gut microbiota of healthy and diseased patients, where the primary method for studying the microbiome involves comparing microbiota composition between individuals or model animals with shotgun metagenomics and 16S rDNA sequencing.<sup>11</sup>

As another example of a disease-related change to the microbiome, fecal samples of colorectal cancer patients seemed to be enriched with *Bacteroidetes*, whereas in the fecal samples of healthy controls, *Firmicutes* were one of the major phyla detected.<sup>12</sup> Further, it has been shown that variances in the gut microbiota can account for differences in outcomes for patients who suffer from recurrent *Clostridium difficile* infection.<sup>13, 14</sup>

In addition to reports of the microbiome affecting behavior, mood, and decision-making,<sup>15, 16, 17, 18</sup> the gut microbiota's influence has been implicated in multiple central nervous system (CNS) diseases such as Parkinson's disease,<sup>19, 20, 21, 22, 23, 24</sup> depression and anxiety,<sup>19, 25, 26, 27, 28</sup> autism spectrum disorder (ASD),<sup>19, 25, 29, 30, 31, 32</sup> attention-deficit hyperactivity disorder (ADHD),<sup>25</sup> schizophrenia,<sup>25, 33</sup> bipolar disorder,<sup>33</sup> multiple sclerosis (MS),<sup>19, 34</sup> Alzheimer's Disease (AD),<sup>24, 34</sup> glioblastomas,<sup>35</sup> and various non-CNS diseases such as obesity,<sup>36</sup> type 2 diabetes,<sup>36</sup> glucose intolerance,<sup>36</sup> insulin resistance,<sup>36</sup> acne,<sup>37</sup> atopic dermatitis,<sup>37</sup> psoriasis,<sup>37</sup> colorectal cancer,<sup>11</sup> non-alcoholic fatty liver disease (NAFLD),<sup>36, 38</sup> irritable bowel syndrome (IBS),<sup>25</sup> Crohn's disease (CD),<sup>39</sup> ulcerative colitis (UC),<sup>39</sup> substance use disorders (including opioid use disorder (OUD)),<sup>40</sup> fibromyalgia,<sup>41</sup> chronic pain,<sup>42, 43, 44</sup> stroke,<sup>45</sup> lung disease,<sup>46</sup> celiac disease,<sup>47</sup> and metabolic syndrome.<sup>48</sup> It is also important to recognize that genotoxic bacterial proteins such as the typhoid toxin directly inflict damage to the host's DNA.<sup>49</sup>

# SIGNIFICANT FACTORS IN THE HUMAN-MICROBIOME INTERACTION

## Biochemical Signaling from Gut Microbiota to the Human

To provide support for the interactions shown in **Figure 1** (see main article), it is worthwhile to examine how the primary postbiotics can alter the host's physiological state by reviewing the roles of tryptophan metabolites, bile acids, short-chain fatty acids (SCFAs), and immune system signaling.

### 1. Tryptophan Metabolism

The essential amino acid tryptophan is primarily produced from dietary protein metabolism and enters the vascular system in the intestinal tract. Enterochromaffin cells in the digestive tract metabolize tryptophan to serotonin, which is stored systemically in platelets. Spore-forming bacteria in the gut modulate the induction of serotonin in the colon and blood, and in doing so regulate GI motility and clotting.<sup>50</sup> Free circulating tryptophan can cross the blood-brain barrier (BBB) to support serotonin synthesis within the brain. Additional tryptophan metabolism is provided by the kynurenine and aryl hydrocarbon receptor ligand pathways.<sup>51</sup> These tryptophan metabolites are associated with regulation of gut and brain immune homeostasis, gut and brain inflammatory response, inflammatory bowel disease, gut barrier function, and depression.<sup>40, 52</sup> Furthermore, mouse models of autism spectrum disorder are associated with impaired serotonin production, which is correlated with a decrease of *Blautia*,<sup>30</sup> and rat models with fecal transplantation from depressed patients had alterations in tryptophan metabolism.<sup>25</sup> Tryptophan can directly influence the brain, where tryptophan metabolites affect microglia activity, leading to a reduction of CNS inflammation.<sup>34</sup>

### 2. Bile Acids

Bile acids are metabolites of cholesterol catabolism, which affects nutrient absorption and gut immune homeostasis. Primary bile acids are transported from the liver to the gut, where they undergo biotransformation.<sup>40</sup> Bile acids digest dietary lipids, regulate lipid metabolism, and are important for small intestine epithelial barrier function. The primary bile acids include cholic acid, chenodeoxycholic acid, and muricholic acid. Using  $7\alpha$ -dehydroxylation, *Blautia* converts the primary bile acids into secondary bile acids, which include deoxycholic acid, lithocholic acid, and ursodeoxycholic acid. Further, there are taurine-conjugated and -deconjugated forms of primary and secondary bile acids. *Bifidobacterium* and *Lactobacillus* produce bile salt hydrolase that deconjugates primary and secondary bile acids from taurine and glycine. Mouse models of autism spectrum disorder have deficient bile conversion, suggesting a link between bile metabolism and ASD.<sup>30</sup>

### 3. Short-Chain Fatty Acids

The three most common SCFAs are acetate, propionate, and butyrate, with acetate being approximately three times more common than propionate and butyrate.<sup>38</sup> SCFAs are primarily generated by the gut microbiota-driven fermentation of dietary fibers in the colon and the metabolism of dietary fats or dietary proteins in the absence of dietary fibers. SCFA metabolites are used for energy in the colon, and some SCFAs are transported to the liver by the hepatic portal vein. SCFAs are released from the liver for circulation. Local SCFAs affect gut membrane permeability, and circulating SCFAs can cross the BBB to affect neural and glia cells.<sup>40</sup> SCFAs

also can affect BBB permeability and act as a histone deacetylase inhibitor.<sup>38, 40</sup> There is evidence of alterations in the amount of SCFAs in ASD children, but it is unclear whether there is an increase or decrease, as the evidence points both ways.<sup>25</sup>

#### 4. Immune System

The immune system plays a central role in those interactions between the human and its gut microbiome that are associated with CNS diseases, including schizophrenia,<sup>25</sup> glioblastomas,<sup>35</sup> Parkinson's<sup>35</sup> and Alzheimer's diseases,<sup>35</sup> and multiple sclerosis,<sup>35</sup> all associated with changes in the immune system. There are three main ways the gut microbiota interacts with the immune system: inflammasomes, type-I interferon signaling (IFN-I), and NF- $\kappa$ B signaling.

Inflammasomes are signaling complexes that activate in response to microbial and endogenous threats. Pattern-recognition receptors (PRRs) are involved with inflammasome activation. NLRC5 acts to negatively regulate NF- $\kappa$ B and IFN-I signaling to modulate innate immune system homeostasis. Gut microbiota are able to change inflammation through inflammasome signaling.<sup>35</sup>

IFN-I is a cytokine that influences innate immunity, adaptive immunity, and maintenance of host homeostasis. IFN-I is induced by pathogen-associated molecular patterns (PAMPs) and IFN-I secretion depends on the PRRs. IFN-I signaling can be utilized for protective effects for the host, such as inducing anti-viral responses. Host IFN-I signaling influences microbiota composition. Glioblastomas are associated with altered IFN-I signaling.<sup>35</sup>

The NF- $\kappa$ B family of transcription factors influences innate immunity, adaptive immunity, and maintenance of the immune system. Alterations of gut microbiota composition influence different inflammatory diseases by regulating innate immunity and NF- $\kappa$ B signaling. Parkinson's disease and Alzheimer's disease are associated with a pro-inflammatory reaction partially through NF- $\kappa$ B signaling.<sup>35</sup>

Through signaling with the immune system, the gut microbiota can influence immune cells' development in the CNS, such as *Bacteroides fragilis* promoting Th1 cell development and *Clostridium* promoting Treg cell differentiation. Furthermore, microbe-produced SCFAs activate inflammasomes and influence the differentiation of suppressive Tregs, and long-chain fatty acids (LCFAs) promote differentiation and proliferation of Th1 and Th17 cells while simultaneously increasing mRNA expression of pro-inflammatory factors. Hyperactive Th1 and Th17 cells can lead to infiltration of immune cells in the CNS and progression of multiple sclerosis, and recruitment of immune cells can lead to the progression of glioblastomas.<sup>35</sup> The translocation of microorganisms from the gut to lymphatic tissues via immune cells will both challenge and train the mammalian immune system.<sup>53</sup>

### **Gut Microbiota and Host CNS Interactions**

In addition to the hypothalamic-pituitary-adrenal (HPA) axis and microglia interactions discussed in the main article,<sup>20, 26, 34, 35</sup> there is also an intriguing conference report that bacteria from the gut may migrate from the GI system directly to astrocytes in the brain to form a brain microbiota.<sup>54</sup>

#### 1. The Vagus and Enteric Nervous Systems

The enteric nervous system (ENS) provides local control of digestive functions and an intimate connection between the stromal cells of the GI tract and the autonomic nervous system (ANS).

The ENS within the gastrointestinal wall regulates enteric processes that include immune response, detecting nutrients, motility, microvascular circulation, intestinal barrier function, and epithelial secretion of fluids, ions, and bioactive peptides.<sup>55, 56, 57</sup> The gut microbiota regulates maturation of the adult enteric nervous system via enteric serotonin networks.<sup>58</sup> The vagus nerve, connected to all of the layers of the digestive wall, serves as the connection between the CNS and the ENS, but in such a manner that it is never in direct contact with the gut microbiota. Thus, only indirect signals interact with the microbiota through the transport of postbiotic diffusion or by cells in the epithelium relaying luminal signals. Afferent vagal and hormonal signals from the gut to the brain regarding the quality and quantity of food affect the sensation of satiety, energy balance, and glucose homeostasis.<sup>59</sup> Enteroendocrine cells, which control motility, secretion, and food intake in the presence of luminal carbohydrates, triglycerides, and proteins, interact with the vagus nerve directly through the vagus nerve's serotonin-activating 5-HT<sub>3</sub> receptors, and gut hormones such as cholecystokinin, glucagon-like peptide-1, and peptide YY affect the brain through receptors in the vagus nerve. SCFAs, LCFAs, and TLR4 also affect the vagus nerve.<sup>60</sup> The Dresden model of Parkinson's disease proposes that the microbiota and the vagus nerve are tied to the disease etiology, and that environmental toxins such as rotenone cause  $\alpha$ -synuclein production in the gut. Once produced, the  $\alpha$ -synuclein is then transferred from the enteric system to the CNS via the vagus nerve.<sup>20</sup> Once in the brain,  $\alpha$ -synuclein disrupts mitochondria function, leading to the production of reactive oxygen species and the progression of the disease.<sup>61</sup> Traumatic brain injury can trigger increases in intestinal permeability. Is this the result of the neuro-enteric axis,<sup>62</sup> or might it also be associated with shifts in the microbiome?

2. The Inflammasomes (Covered in the main article)
3. Microglia (Covered in the main article)
4. HPA Axis (Covered in the main article)
5. Development (Covered in the main article)
6. Gut Microbiota Spatial Heterogeneity

The heterogeneity of the gut microbiome, both in types and densities along the length of the GI tract and with depth into mucosal layers, is coupled with physiological gradients in pH and pressure.<sup>63</sup> At the simplest level, it has been shown that there is large variability between the compositions of the microbes in the mucosa and the stool.<sup>64</sup> Next-generation Illumina gene sequencing of the highly preserved 16S rRNA gene has shown that there are gradients of microbial community composition: the mouth has the most phylogenetic diversity, the stomach the least, and there is increasing diversity down the GI tract from the stomach to the stool.<sup>65</sup> Due to the diversity of the gut microbiota throughout the GI tract, there are differences in the way the microbial communities respond to various inputs. For instance, pyrosequencing the 16S rRNA gene (V1–2) after 8 weeks of Vitamin D3 supplementation showed that only the composition of the upper GI tract (gastric corpus, antrum, and duodenum) changed.<sup>66</sup> While the upper GI tract saw decreased counts of *Gammaproteobacteria*, including *Pseudomonas spp.* and *Escherichia/Shigella spp.*, there were no measurable differences in the microbial composition in the terminal ileum, appendiceal orifice, ascending colon, and sigmoid colon, or in stools.<sup>66</sup> This might help to explain why Vitamin D3 supplementation may ameliorate inflammatory bowel disease.<sup>67</sup> A similar distribution was seen in healthy subjects, where *Enterobacteriaceae* were shown to increase toward the distal end of the GI tract (the sigmoid colon and rectum), whereas

*Streptococcus* species, *Comamonadaceae*, *Enterococcus* species, and *Corynebacterium* species had increased abundance in the proximal end of the GI tract (the cecum and transverse colon).<sup>68</sup> There also has been new research into “smart pills” that are able to collect intestinal fluid samples autonomously to measure gut microbe diversity with higher resolution and lower costs.<sup>69, 70, 71, 72</sup>

## EXTERNAL INFLUENCES ON THE MICROBIOME

### Xenobiotics and the Exposome

Here we provide specific details that can add a useful perspective to the material presented in the main review article.

Emulsifiers, a food additive, can disrupt the mucus layer that protects the gut epithelium from bacteria. Examples of emulsifiers in processed food include carboxymethylcellulose and polysorbate-80, which have been shown to affect SCFA levels found in feces. Non-caloric artificial sweeteners such as saccharin, sucralose, aspartame, and acesulfame K are associated with inducing glucose intolerance in humans and a disruption of the gut microbiota through an increase of *Enterobacteriaceae*, *Deltaproteobacteria*, and *Actinobacteria* phyla, and a decrease of probiotics *Bifidobacterium*, *Lactobacillus*, and *Bacteroides*. Polyphenols, commonly found in red wine, are associated with the increase of probiotics and the decrease of pathogenic bacteria.<sup>73</sup>

The gut microbiota is both resilient and plastic. It maintains a relatively stable steady state despite changes in diet or antibiotics.<sup>74</sup> However, it can be formed and guided toward different paths through diet or directed therapies. With this in mind, some targeted approaches to alter gut microbiota composition have been attempted, such as using *Clostridium scindens* to increase resistance to *C. difficile* infection by targeting the pathway of secondary bile acid.<sup>75</sup> There have been forays into bioengineering probiotics for prevention of colonization, production of antimicrobial factors, immunomodulation and cytoprotection, and regulation of virulence gene expression.<sup>76</sup> Another example of microbial manipulation is the use of a tungstate treatment to selectively inhibit molybdenum cofactor-dependent microbial respiratory pathways, thereby reducing inflammation in colitis.<sup>77</sup> Thus it is important to account for the effects of the gut microbiota when considering drug efficacy, availability, and toxicity.<sup>74</sup>

### Probiotics, Prebiotics, Synbiotics, and the FDA

*Lactobacillus* is an example of a beneficial bacteria that is used as a probiotic to prevent stress-induced synaptic dysfunction and thereby reduce the response of the HPA axis to chronic stress and relieve the symptoms of anxiety and major depression disorder.<sup>26</sup> Probiotics also have been used to reverse symptoms of diseases such as IBS.<sup>25</sup> Other beneficial effects include anti-pathogen and anti-inflammation activity and mitigating symptoms of CNS disorders.<sup>78</sup> Probiotics also can potentially control body weight, adipose tissue, and inflammation and prevent metabolic syndrome.<sup>48</sup> So-called psychobiotics refer to probiotics that produce neurochemicals such as GABA, serotonin, and dopamine. These compounds have the potential to directly influence ENS signaling and indirectly influence host brain function and behavior.<sup>79</sup>

While prebiotics are indigestible to the host, they serve as microbial nutrients and act to promote the growth of beneficial bacteria populations. Bifidogenic prebiotics include inulin, oligofructose, fructo-oligosaccharides, galactose-containing oligosaccharides, and xylose-containing oligosaccharides.<sup>48</sup>

An example of a symbiotic, which promotes the beneficial effect of probiotics, is the combination of the prebiotic inulin with the probiotics *Bifidobacterium animalis*, *Lactobacillus acidophilus*, and *Lactobacillus paracasei*.<sup>78</sup>

## Diet

The microbiome changes associated with various diets have been examined in some detail. The Western diet and lifestyle are associated with a high-calorie, high-fat, low-fiber diet and a sedentary lifestyle and produce a less diverse microbial ecology when compared to other diets, such as those high in fiber.<sup>80</sup> *Bifidobacterium* and *Eubacterium* are reduced and there is an increase of cancer-promoting nitrosamines and inflammation.<sup>73</sup> In addition to the production of TMA by the gut microbiome, a high-fat diet can induce inflammasome activation and has been shown to worsen the effects of antibiotics in *Oreochromis niloticus*.<sup>35, 81</sup> Metformin and berberine are two drugs that treat type 2 diabetes by reversing the microbiota modulations of a high-fat diet. The drugs decrease microbiota diversity but increase the number of SCFA-producing bacteria *Allobaculum*, *Bacteroides*, *Blautia*, *Butyricoccus*, and *Phascolarctobacterium*.<sup>73</sup>

The Mediterranean diet is high in fiber and antioxidants and low in red meat, and it is associated with increased levels of fecal SCFAs and probiotics *Bifidobacteria*, *Lactobacilli*, *Eubacteria*, *Bacteroides* and *Prevotella*.<sup>73</sup> In general, the amount of SCFAs produced is dependent not only on the amount of fiber but also the type of fiber eaten.<sup>82</sup> Furthermore, gluten is metabolized in the gut primarily by *Firmicutes*, *Actinobacteria*, and *Proteobacteria*.<sup>47</sup>

Intermittent fasting is a diet that alternates between periods of fasting and non-fasting. When *Drosophila melanogaster* were fed on a 2-day non-fasting and 5-day fasting diet, triacylglyceride levels increased and led to a decrease of bacterial load in the gut.<sup>83, 84</sup> Intermittent fasting has also been investigated in mice. After a diet of fasting every other day, mice gut microbiota had a large increase of *Firmicutes*, which was shown to induce beiging of white adipose tissue, weight loss, and attenuation of metabolic dysfunction.<sup>85</sup> How might such protocols become a part of clinical pharmacology?

The ketogenic diet is a high-fat, low-carbohydrate diet that has been well established as a treatment for refractory epilepsy but is also used for treating autism spectrum disorder, Alzheimer's disease, metabolic syndrome, and cancer. The ketogenic diet alters the microbiota by decreasing alpha diversity (within a sample) and increasing the taxa *Akkermansia muciniphila* and *Parabacteroides*. *Akkermansia muciniphila* and *Parabacteroides* are associated with decreased systemic gamma-glutamylated amino acids and elevated hippocampal GABA/glutamate levels, which provide a seizure protective effect.<sup>86</sup> Children on the ketogenic diet had a decrease of *Bifidobacterium* and *Eubacterium rectale*, which is associated with production of the SCFAs acetate and butyrate, respectively.<sup>87</sup>

Fecal transplants in mice enhanced healthspan and lifespan.<sup>88</sup> More active lifestyles, such as those of professional athletes (and the possible use of nutritional supplements), result in increased gut microbiota diversity,<sup>89</sup> which suggests the possibility of legal questions and sporting regulations regarding the possible use of fecal transplants in increasing an athlete's competitive advantage in sports.

## Drugs

It is known that there are different passive permeability characteristics among the different portions of the human intestines.<sup>90</sup> There are simple differences of the ion permeability as well; for instance, the jejunum is highly permeable to sodium and chloride ions, while the colon is more anion- than cation-selective.<sup>90</sup> Early work on drug permeability within rat intestines has shown that there is a decrease in permeability to hydrophilic drugs and a significant increase in permeability for hydrophobic drugs in the small intestine.<sup>91</sup> Overall, a recent review has concluded that the varying factors throughout the GI tract, such as osmolality, the unstirred water layer, mucosal differences, and the presence of other fluids, all must be taken into account when considering how a body will take in a drug.<sup>92</sup> Within the small intestine, there is a thin and discontinuous mucous layer, composed mostly of MUC2, that is able to effectively facilitate molecular transport.<sup>93</sup> However, within the colon there are two layers of mucous, a thin, sterile inner layer and a thicker, more porous outer layer, to allow a symbiotic relationship with gut microbiota.<sup>94</sup> The mucous layers can affect drug absorption due to size restriction through the mucous<sup>95</sup> or electrostatic interactions between the drug and the mucin when the pH is greater than 2.6.<sup>92</sup> In addition, the unstirred water layer, which is a stagnant boundary layer above the epithelium, can affect drug absorption.<sup>92</sup> It has been shown that between 10% and 36% of transport resistance is due to the unstirred water layer,<sup>96</sup> which varies in thickness along the GI tract depending on the amount of villi within the space.<sup>92</sup> Further research has shown that it is not epithelial surface area that is the main determinant of drug absorption, but rather the mucus layer at the surface of the epithelium and the fluidity of the epithelial cell membrane.<sup>97</sup> Diet can affect drug absorption by regulating enzymes involved in drug metabolism, limiting drug bioavailability.<sup>98</sup> Note that these layers could severely compromise the ability to obtain representative samples of the microbiota of each region.

In addition to variances in the way a drug is absorbed throughout the GI tract, it has been shown that the location within the GI tract changes the way a drug is metabolized. Phase I metabolism, which is the introduction of a reactive group by means of oxidation, reduction, and hydrolysis, predominantly occurs in precision-cut, ileum intestinal slices, and phase II metabolism, which is the conjugation with polar moieties occurring by means of glucuronidation, sulfation, acetylation, and methylation, mostly takes place in precision-cut, colon intestinal slices.<sup>99, 100</sup> This is heavily due to the distribution of P450 enzymes, which account for about half of overall elimination of commonly used drugs.<sup>99</sup>

The gut microbiota affects drug efficiency both directly and indirectly through multiple mechanisms.<sup>101</sup> Some direct means of interaction include acetylation, deacetylation, and demethylation.<sup>102</sup> Such mechanisms can sometimes be helpful, as in treating inflammatory bowel disease with sulfasalazine, which is turned into the active drug 5-aminosalicylic acid by microbial enzymes.<sup>102</sup> However, the gut microbiota can indirectly reduce the efficacy of a drug, as is the case with acetaminophen (paracetamol), which must compete for sulfonation by the liver with the microbial metabolite p-cresol, ultimately leading to some drug toxicity.<sup>103</sup> Postbiotics also can affect liver metabolism, such as the expression of cytochrome P450 enzymes.<sup>63</sup> To take these factors into account, researchers have recently published a genome-scale metabolic reconstruction for 773 members of the gut microbiota so that physiologically based pharmacokinetic models are more accurate.<sup>104</sup>

Wilson and Nicholson<sup>105</sup> and Thiele *et al.*<sup>101</sup> provide a number of informative examples of how the gut microbiome interacts with drug metabolism, efficacy, and toxicity. Oral drugs



interact with the gut microbiota first, and intravenous (IV) drugs interact with the liver before the gut microbiota. Interactions of the gut microbiota with drugs include reduction, hydrolysis, dihydroxylation, dealkylation, demethylation, decarboxylation, acetylation, deamination, and deconjugation. Liver interactions are primarily oxidations, conjugations, reductions, and hydrolyses. Enterohepatic cycling involves the transfer of metabolites between the gut and liver and can result in drugs being reactivated by gut microbiota. The liver acts as the way to cause metabolites to enter circulation. Metabolites are eliminated in feces or by the kidneys.<sup>105</sup>

One of the pharmacological challenges is to identify whether human microbiota can serve as agonists to G-protein coupled receptors (GPCRs). In a recent demonstration, a panel of bacteria were selected to create a forward chemical screen that can be used to detect small molecules produced by gut microbiota that interact with host GPCRs.<sup>106</sup> It was shown that small molecules produced by the gut microbiota can activate multiple GPCRs, including orphan GPCRs, serving as an unanticipated source of GPCR ligands that might adversely affect drug action.

## Opioids

As a final example of the emerging complexity of opioid clinical pharmacology and its implications for precision medicine, suppose that our Vitruvian human in **Figure 1** were to ingest 200 ml of grapefruit juice every day for five days, and be treated on day four with a 10 mg oral dose of oxycodone hydrochloride. The mean area under the oxycodone concentration-time curve, the peak plasma concentration, and oxycodone half-life would be increased by factors of 1.7, 1.5, and 1.2, respectively, all a result of the grapefruit juice inhibiting first-pass intestinal CYP3A4-mediated oxycodone metabolism and transporter proteins such as P-glycoprotein (P-gp) and organic anion transporter polypeptide.<sup>107</sup> In addition, grapefruit juice decreases the production of noroxycodone and noroxymorphone, and increases production of oxymorphone. One might reasonably assume that there are many more as yet unidentified interactions between these drugs, the microbiome, and the gut-liver-immune-brain axis GLIBA.<sup>108</sup> The roles of endogenous opioids that are a dopamine metabolite produced by mammalian cells<sup>109, 110</sup> are worthy of detailed study, could have significant biological, medical, and social implications, and may play a role in some of the interactions in **Figure 1**.

## DECODING MICROBIOME-HUMAN INTERACTIONS

### Pharmacogenomics/Microbiomics (Covered in the main article)

### Mathematical Modeling of the Microbiome-Host Interaction

One method for *in silico* modeling of these interactions is constraint-based reconstruction and analysis (COBRA), in which a metabolic reconstruction of an organism is assembled in a bottom-up manner on the basis of reaction stoichiometry and physicochemical properties obtained from genome annotations and biochemical and physiological data.<sup>111</sup> This reduces the system to a set of linear equations that is able to provide physiologically relevant solutions.<sup>101</sup> This type of system has been used, for example, to investigate how the body interacts with levodopa, the most common drug administered for Parkinson's disease.<sup>101</sup> From this approach, it was determined that plasma-levels of levodopa were most sensitive to the gastric emptying rate and the loss of bioavailability due to microbial activity.<sup>101</sup> Further work to predict a drug's effects have come from research within the field of quantitative systems toxicology (QST),

which is an approach to quantitatively understand the toxic effects of a chemical on a living organism, from molecular alterations to phenotypical observations, through the integration of computational and experimental methods.<sup>112</sup> One of the fundamentals of QST is the use of molecular descriptors and physicochemical properties to make accurate *in silico* predictions in quantitative structure-activity relationships (QSARs).<sup>112</sup> In addition, pathway analysis tools, such as Ingenuity Pathway Analysis and DAVID/KEGG, are being used to create network-based models of biological systems.<sup>113</sup> Models such as these have been used to determine the molecular mechanisms responsible for sunitinib cardiotoxicity and identify a prophylactic intervention.<sup>114</sup> Multi-omic techniques under development for rapid determination of drug mechanism of action should be readily extensible to organ-chip systems with microbiomes.<sup>115</sup> The quantity of the data and the variety of interactions will exceed the capacities of standard relational databases, with graph databases offering the greatest potential, at least for describing the interaction network.<sup>116, 117, 118</sup>

## **Assays for Understanding Host-Microbiome Interactions (Covered in the main article)**

### **Organs-on-Chips for *In Vitro* Studies of Microbiome-Organ-Organ Interactions**

#### 1. The Rationale for Microphysiological Systems (MPS) GLIBA Models

Shuler began pioneering work on organs-on-chips in the 1990s and remains active in the field,<sup>119, 120, 121, 122, 123, 124, 125, 126, 127, 128, 129, 130, 131, 132, 133, 134, 135</sup> with some of his work directly related to toxicology.<sup>119, 120, 135, 136</sup> A growing number of original papers and reviews are relevant to the MPS and the microbiome GLIBA (M-GLIBA),<sup>137, 138, 139, 140, 141, 142, 143, 144, 145, 146, 147</sup> with substantial progress in the implementation of the four organs of the GLIBA: the gut,<sup>148, 124, 129, 148, 149, 150, 151, 152</sup> the liver,<sup>153, 131, 154, 155, 156, 157, 158, 159, 160, 161, 162, 163</sup> and the neurovascular unit and/or the blood-brain barrier (BBB).<sup>122, 164, 165, 166, 167, 168, 169, 170, 171, 172, 173, 174, 175, 176, 177, 178</sup> Zhang and Radisic provide an excellent overview of the rapidly expanding commercial market.<sup>179</sup>

Organoids are often a useful intermediate step between a biopsy or stem cells and a tissue chip, and they can be used in MPS organoid chips,<sup>151, 180, 181, 182, 183, 184, 185</sup> but this discussion is beyond the scope of this review. Organoids are already being used to propagate cells from a patient's cancer biopsy to predict the response to different cancer therapies using a variety of live-cell assays, including patient-derived xenografts and organoids.<sup>186, 187, 188, 189</sup>

#### 2. Single Organ Chips Needed for the M-GLIBA (Covered in the main article)

#### 3. Multiple-Organ MPS Models

There is a small but expanding literature on multi-organ MPS.<sup>128, 130, 132, 133, 135, 139, 145, 147, 161, 162, 163, 174, 185, 190, 191, 192, 193, 194, 195, 196, 197, 198, 199, 200</sup> Boeri *et al.* provide a review that focuses on liver multi-organ communication with the gut, microbiota, and brain.<sup>201</sup> Logsdon *et al.* review how the BBB connects the microbiome to the brain via bacterial and host cytokines, peripheral immune cells, and other secreted factors.<sup>202</sup> The coupling between different organs can either be physical, as demonstrated by several groups using either integrated or connected chips,<sup>132, 163, 193, 198</sup> or functionally by transferring effluent media from the output of one chip into the input of another organ chip.<sup>199, 200, 203</sup> One advantage of the functional approach is that it is easy to adjust the fraction of the media in one organ that has been conditioned by another, whether done

manually<sup>203</sup> or by an automated pipetting robot.<sup>200</sup> Functional coupling does not even require that the different organs have to be co-localized, as long as the biochemical signals of interest can survive freezing and transport,<sup>203</sup> and offers the advantage of ready access to the input and output of the media for each organ. The need to examine the metabolic coupling between different cell types, particularly endothelial and stromal cells, can be addressed using connected organ chips for which the cell types that are normally cultured in close proximity or even in contact are instead spatially separated but joined fluidically.<sup>204</sup> The evaluation of juxtacrine signaling, for example between astrocyte end feet, pericytes, and endothelial cells, might benefit from the comparison of physically coupled co-cultures with separated ones.

In any multiple organ application, it is important to recognize that recirculation will increase the ability of a small population of cells in each organ to condition some volume of common media over time as compared to single-pass perfusion, that the common media will have to be periodically or continuously refreshed and a fraction removed, since the multiple organ chip will need to be fed and is not likely to have sufficient kidney or liver function to detoxify the recirculating media by excreting toxic metabolites, and that the total volume of media being recirculated must be scaled properly to the numbers of cells used, lest the circulating signals be diluted below the threshold of physiological effect.<sup>205, 206</sup> There are also economical and practical considerations in systems that couple multiple organs. If the system is large, expensive, and difficult to maintain, it is less likely to be used in moderately parallel experiments than one that is compact, inexpensive, and easy to use and replace should a component fail. Given the need to culture tissue chips for extended periods of time, it is important to have a system that can be readily sterilized. Multiple organs integrated on a single larger chip have the possible advantage of operating with smaller fluid volumes than those that are connected by tubing, discrete reservoirs, and/or pipettes. Integrated systems will have a lower probability of being fully functional than separated systems for which the most highly functional organ chips can be preselected and sub-optimal organs can be readily replaced, rather than having to seed all cells on a single integrated chip with the expectation that some organs on the chip will prove better than others. If the integrated chips are small, inexpensive, and do not require a large number of cells, this may not be an issue.

From this analysis, we conclude that it is most appropriate to use simple, massively parallel well-plate cultures for high-throughput screening, for example, for the effects of a drug or toxin on a specific receptor or transporter. Single-organ or organoid MPS chips are already available commercially for medium-throughput, high-content screening of phenomena that can only be reproduced in multicellular co-cultures, particularly those that involve either a 2D barrier separating different cell types, or multicellular interactions with a non-trivial extracellular matrix. There is growing recognition that microphysiological systems with multiple organs are better suited for high-content, low-throughput identification and recapitulation of complex pharmacological and toxicological kinetics and dynamics and organ-organ and drug-organ-organ interactions than are isolated monocultures on plastic, albeit at a much greater investment in operator training and experimental complexity.<sup>132, 198, 207</sup> That investment, while at first glance significant, needs to be compared not to high-throughput screening but to a long-term, multiple animal study, which may not reflect human physiology, pathology, or toxicology, and is also expensive. Returning to the focus of this review, studies of the interaction between human multiple organs and their individual microbiota may well be an ideal application of multiple, coupled organ chips.

#### 4. MPS for Drug Discovery

A number of papers address drug toxicity<sup>135, 136, 143, 208, 209</sup> and pharmacology.<sup>134, 195, 210, 211, 212, 213, 214</sup> Of the many groups working on organs-on-chips, only a few are developing the pharmacodynamic (PD) tools that will be needed by clinical pharmacologists and toxicologists to fully utilize tissue chips.<sup>127, 132, 134, 198, 215, 216</sup> The reader is urged to study a comprehensive review of the iterative measurement-modeling connection between MPS and quantitative systems pharmacology.<sup>217</sup>

Although beyond the scope of this review, it is worthwhile to note that studies of the microbiota of male and female genitourinary systems<sup>218, 219, 220, 221, 222, 223, 224, 225, 226</sup> could be conducted using organ-on-chip models,<sup>192, 227, 228, 229, 230, 231, 232</sup> which might provide insights into the interplay between the vagina microbiome, human papilloma virus, inflammation, and cancer,<sup>6</sup> and the effect of the vaginal and gut microbiota on drug metabolism and efficacy.<sup>233</sup>

## LITERATURE CITED

1. Kaddurah-Daouk R, Kristal BS, Weinshilboum RM. Metabolomics: A global biochemical approach to drug response and disease. *Annual Review of Pharmacology and Toxicology*, vol. 48, 2008, pp 653-683.
2. Kaddurah-Daouk R, *et al.* Pretreatment metabotype as a predictor of response to sertraline or placebo in depressed outpatients: a proof of concept. *Translational Psychiatry* **1**. (2011)
3. Neavin D, Kaddurah-Daouk R, Weinshilboum R. Pharmacometabolomics informs pharmacogenomics. *Metabolomics* **12**. (2016)
4. Varma VR, *et al.* Brain and blood metabolite signatures of pathology and progression in Alzheimer disease: A targeted metabolomics study. *PLoS Med* **15**. (2018)
5. Beger RD, *et al.* Metabolomics enables precision medicine: "A White Paper, Community Perspective". *Metabolomics* **12**. (2016)
6. Ilhan ZE, *et al.* Deciphering the complex interplay between microbiota, HPV, inflammation and cancer through cervicovaginal metabolic profiling. *EBioMedicine* **44** 675-690. (2019)
7. Pirmohamed M. Acceptance of Biomarker-Based Tests for Application in Clinical Practice: Criteria and Obstacles. *Clin Pharmacol Ther* **88** 862-866. (2010)
8. Baurley JW, McMahan CS, Ervin CM, Pardamean B, Bergen AW. Biosignature Discovery for Substance Use Disorders Using Statistical Learning. *Trends Mol Med* **24** 221-235. (2018)
9. Durack J, Lynch SV. The gut microbiome: Relationships with disease and opportunities for therapy. *J Exp Med* **216** 20-40. (2019)
10. Kho ZY, Lal SK. The Human Gut Microbiome - A Potential Controller of Wellness and Disease. *Front Microbiol* **9**. (2018)

11. Behrouzi A, Nafari AH, Siadat SD. The significance of microbiome in personalized medicine. *Clinical and Translational Medicine* **8**. (2019)
12. Russo E, *et al.* Preliminary Comparison of Oral and Intestinal Human Microbiota in Patients with Colorectal Cancer: A Pilot Study. *Front Microbiol* **8**. (2018)
13. Khanna S, *et al.* Gut microbiome predictors of treatment response and recurrence in primary Clostridium difficile infection. *Aliment Pharmacol Ther* **44** 715-727. (2016)
14. Seekatz AM, Rao K, Santhosh K, Young VB. Dynamics of the fecal microbiome in patients with recurrent and nonrecurrent Clostridium difficile infection. *Genome Med* **8**. (2016)
15. del Sol A, Balling R, Hood L, Galas D. Diseases as network perturbations *Curr Opin Biotechnol* **21** 556-571. (2010)
16. Li L, *et al.* Gut microbes in correlation with mood: case study in a closed experimental human life support system. *Neurogastroenterol Motil* **28** 1233-1240. (2016)
17. Sylvia KE, Demas GE. A gut feeling: Microbiome-brain-immune interactions modulate social and affective behaviors. *Hormones and Behavior* **99** 41-49. (2018)
18. Bercik P, *et al.* The Intestinal Microbiota Affect Central Levels of Brain-Derived Neurotropic Factor and Behavior in Mice. *Gastroenterology* **141** 599-U701. (2011)
19. Wang Y, Kasper LH. The role of microbiome in central nervous system disorders. *Brain Behav Immun* **38** 1-12. (2014)
20. Klingelhoefer L, Reichmann H. Pathogenesis of Parkinson disease-the gut-brain axis and environmental factors *Nat Rev Neurol* **11** 625-636. (2015)
21. Felice VD, Quigley EM, Sullivan AM, O'Keefe GW, O'Mahony SM. Microbiota-gut-brain signalling in Parkinson's disease: Implications for non-motor symptoms. *Parkinsonism Relat Disord* **27** 1-8. (2016)
22. Hasegawa S, *et al.* Intestinal Dysbiosis and Lowered Serum Lipopolysaccharide-Binding Protein in Parkinson's Disease. *PLoS One* **10**. (2015)
23. Sampson TR, *et al.* Gut Microbiota Regulate Motor Deficits and Neuroinflammation in a Model of Parkinson's Disease. *Cell* **167** 1469-1480. (2016)
24. Bauer KC, Huus KE, Finlay BB. Microbes and the mind: emerging hallmarks of the gut microbiota-brain axis. *Cell Microbiol* **18** 632-644. (2016)
25. Felice VD, O'Mahony SM. The microbiome and disorders of the central nervous system. *Pharmacol Biochem Behav* **160** 1-13. (2017)
26. Clapp M, *et al.* Gut microbiota's effect on mental health: The gut-brain axis *Clin Pract* **7** 131-136. (2017)
27. Jiang HY, *et al.* Altered fecal microbiota composition in patients with major depressive disorder. *Brain Behav Immun* **48** 186-194. (2015)

28. Cheung SG, *et al.* Systematic Review of Gut Microbiota and Major Depression. *Frontiers in Psychiatry* **10**. (2019)
29. Parracho H, Bingham MO, Gibson GR, McCartney AL. Differences between the gut microflora of children with autistic spectrum disorders and that of healthy children. *J Med Microbiol* **54** 987-991. (2005)
30. Golubeva AV, *et al.* Microbiota-related Changes in Bile Acid & Tryptophan Metabolism are Associated with Gastrointestinal Dysfunction in a Mouse Model of Autism *EBioMedicine* **24** 166-178. (2017)
31. Abdelli LS, Samsam A, Naser SA. Propionic Acid Induces Gliosis and Neuroinflammation through Modulation of PTEN/AKT Pathway in Autism Spectrum Disorder. *Sci Rep* **9**. (2019)
32. Sharon G, *et al.* Human Gut Microbiota from Autism Spectrum Disorder Promote Behavioral Symptoms in Mice. *Cell* **177** 1600-1618. (2019)
33. Dickerson F, Severance E, Yolken RH. The microbiome, immunity, and schizophrenia and bipolar disorder *Brain Behav Immun* **62** 46-52. (2017)
34. Wang YL, *et al.* The Gut-Microglia Connection: Implications for Central Nervous System Diseases. *Front Immunol* **9**. (2018)
35. Ma QQ, *et al.* Impact of microbiota on central nervous system and neurological diseases: the gut-brain axis. *J Neuroinflammation* **16**. (2019)
36. Zmora N, Zeevi D, Korem T, Segal E, Elinav E. Taking it Personally: Personalized Utilization of the Human Microbiome in Health and Disease. *Cell Host & Microbe* **19** 12-20. (2016)
37. Salem I, Ramser A, Isham N, Ghannoum MA. The Gut Microbiome as a Major Regulator of the Gut-Skin Axis. *Front Microbiol* **9**. (2018)
38. Qin YF, Wade PA. Crosstalk between the microbiome and epigenome: messages from bugs. *J Biochem* **163** 105-112. (2018)
39. Dovrolis N, Filidou E, Kolios G. Systems biology in inflammatory bowel diseases: on the way to precision medicine. *Ann Gastroenterol* **32** 233-246. (2019)
40. Meckel KR, Kiraly DD. A potential role for the gut microbiome in substance use disorders. *Psychopharmacology* **236** 1513-1530. (2019)
41. Minerbi A, *et al.* Altered microbiome composition in individuals with fibromyalgia. *Pain* **11** 2589-2602. (2019)
42. Deleo JA, Tanga FY, Tawfik VL. Neupoimmune activation and neuroinflammation in chronic pain and opioid tolerance/hyperalgesia. *Neuroscientist* **10** 40-52. (2004)

43. Shoskes DA, *et al.* Analysis of Gut Microbiome Reveals Significant Differences between Men with Chronic Prostatitis/Chronic Pelvic Pain Syndrome and Controls. *J Urol* **196** 435-440. (2016)
44. O'Mahony SM, Dinan TG, Cryan JF. The gut microbiota as a key regulator of visceral pain. *Pain* **158** S19-S28. (2017)
45. Benakis C, *et al.* Commensal microbiota affects ischemic stroke outcome by regulating intestinal gamma delta T cells. *Nat Med* **22** 516-523. (2016)
46. Anand S, Mande SS. Diet, Microbiota and Gut-Lung Connection. *Front Microbiol* **9**. (2018)
47. Caminero A, *et al.* Diversity of the cultivable human gut microbiome involved in gluten metabolism: isolation of microorganisms with potential interest for coeliac disease. *FEMS Microbiol Ecol* **88** 309-319. (2014)
48. Torres S, Fabersani E, Marquez A, Gauffin-Cano P. Adipose tissue inflammation and metabolic syndrome. The proactive role of probiotics. *Eur J Nutr* **58** 27-43. (2019)
49. Grasso F, Frisan T. Bacterial Genotoxins: Merging the DNA Damage Response into Infection Biology. *Biomolecules* **5** 1762-1782. (2015)
50. Yano JM, *et al.* Indigenous Bacteria from the Gut Microbiota Regulate Host Serotonin Biosynthesis. *Cell* **161** 264-276. (2015)
51. Agus A, Planchais J, Sokol H. Gut Microbiota Regulation of Tryptophan Metabolism in Health and Disease. *Cell Host & Microbe* **23** 716-724. (2018)
52. O'Mahony SM, Clarke G, Borre YE, Dinan TG, Cryan JF. Serotonin, tryptophan metabolism and the brain-gut-microbiome axis. *Behav Brain Res* **277** 32-48. (2015)
53. Zwirzitz B, *et al.* Microbiota of the Gut-Lymph Node Axis: Depletion of Mucosa-Associated Segmented Filamentous Bacteria and Enrichment of Methanobrevibacter by Colistin Sulfate and Linco-Spectin in Pigs. *Front Microbiol* **10**. (2019)
54. Roberts RC, Farmer CB, Walker CK. The human brain microbiome; there are bacteria in our brains!. Program No. 594.08. *2018 Neuroscience Meeting Planner*. San Diego, CA: Society for Neuroscience; 2018.
55. Costa M. Anatomy and physiology of the enteric nervous system. *Gut* **47** 15iv-19. (2000)
56. Nezami BG, Srinivasan S. Enteric Nervous System in the Small Intestine: Pathophysiology and Clinical Implications. *Curr Gastroenterol Rep* **12** 358-365. (2010)
57. Yoo BB, Mazmanian SK. The Enteric Network: Interactions between the Immune and Nervous Systems of the Gut. *Immunity* **46** 910-926. (2017)
58. De Vadder F, *et al.* Gut microbiota regulates maturation of the adult enteric nervous system via enteric serotonin networks. *Proc Natl Acad Sci* **115** 6458-6463. (2018)

59. Berthoud HR. Vagal and hormonal gut-brain communication: from satiation to satisfaction. *Neurogastroenterol Motil* **20** 64-72. (2008)
60. Bonaz B, Bazin T, Pellissier S. The Vagus Nerve at the Interface of the Microbiota-Gut-Brain Axis. *Front Neurosci* **12**. (2018)
61. Ortiz GG, *et al.* Oxidative Stress and Parkinson's Disease: Effects on Environmental Toxicology. In: Ahmad R, editor. *Free Radicals and Diseases*: Intech Europe; 2016. pp. 183-209.
62. Bansal V, *et al.* Traumatic Brain Injury and Intestinal Dysfunction: Uncovering the Neuro-Enteric Axis. *J Neurotrauma* **26** 1353-1359. (2009)
63. Clarke G, *et al.* Gut Reactions: Breaking Down Xenobiotic-Microbiome Interactions. *Pharmacol Rev* **71** 198-224. (2019)
64. Eckburg PB, *et al.* Diversity of the human intestinal microbial flora. *Science* **308** 1635-1638. (2005)
65. Stearns JC, *et al.* Bacterial biogeography of the human digestive tract. *Sci Rep* **1**. (2011)
66. Bashir M, *et al.* Effects of high doses of vitamin D-3 on mucosa-associated gut microbiome vary between regions of the human gastrointestinal tract. *Eur J Nutr* **55** 1479-1489. (2016)
67. Garg M, Lubel JS, Sparrow MP, Holt SG, Gibson PR. Review article: vitamin D and inflammatory bowel disease - established concepts and future directions. *Aliment Pharmacol Ther* **36** 324-344. (2012)
68. de Carcer DA, *et al.* Numerical ecology validates a biogeographical distribution and gender-based effect on mucosa-associated bacteria along the human colon. *ISME Journal* **5** 801-809. (2011)
69. Gupta A, *et al.* Encapsulated fusion protein confers "sense and respond" activity to chitosan-alginate capsules to manipulate bacterial quorum sensing. *Biotechnology and Bioengineering* **110** 552-562. (2013)
70. Becker D, *et al.* Novel Orally Swallowable IntelliCap (R) Device to Quantify Regional Drug Absorption in Human GI Tract Using Diltiazem as Model Drug. *AAPS PharmSciTech* **15** 1490-1497. (2014)
71. Soderlind E, *et al.* Validation of the IntelliCap (R) system as a tool to evaluate extended release profiles in human GI tract using metoprolol as model drug. *Journal of Controlled Release* **217** 300-307. (2015)
72. Jin G, Wang G, Liu X, Cao H, Wang B. 977 – Intestine Microbiome Aspiration (IMBA) Capsule: A New Autonomous and Minimally-Invasive Device for Whole Gut Microbiome Sampling and Mapping. *Gastroenterology* **156** S-205. (2019)
73. Dudek-Wicher RK, Junka A, Bartoszewicz M. The influence of antibiotics and dietary components on gut microbiota. *Gastroenterology Rev* **13** 85-92. (2018)



74. Kashyap PC, Chia N, Nelson H, Segal E, Elinav E. Microbiome at the Frontier of Personalized Medicine. *Mayo Clin Proc* **92** 1855-1864. (2017)
75. Buffie CG, *et al.* Precision microbiome reconstitution restores bile acid mediated resistance to *Clostridium difficile*. *Nature* **517** 205-208. (2015)
76. Amalaradjou MAR, Bhunia AK. Bioengineered probiotics, a strategic approach to control enteric infections. *Bioengineered* **4** 379-387. (2013)
77. Zhu WH, *et al.* Precision editing of the gut microbiota ameliorates colitis. *Nature* **553** 208-+. (2018)
78. Kerry RG, *et al.* Benefaction of probiotics for human health: A review. *J Food Drug Anal* **26** 927-939. (2018)
79. Wall R, *et al.* Bacterial Neuroactive Compounds Produced by Psychobiotics. In: Lyte M, Cryan JF (eds). *Microbial Endocrinology: The Microbiota-Gut-Brain Axis in Health and Disease*. Springer: New York, NY, 2014, pp 221-239.
80. Doestzada M, *et al.* Pharmacomicrobiomics: a novel route towards personalized medicine? *Protein & Cell* **9** 432-445. (2018)
81. Limbu SM, Ma Q, Zhang ML, Du ZY. High fat diet worsens the adverse effects of antibiotic on intestinal health in juvenile Nile tilapia (*Oreochromis niloticus*). *Science of the Total Environment* **680** 169-180. (2019)
82. Baxter NT, *et al.* Dynamics of Human Gut Microbiota and Short-Chain Fatty Acids in Response to Dietary Interventions with Three Fermentable Fibers. *Mbio* **10**. (2019)
83. Cani PD. Human gut microbiome: hopes, threats and promises. *Gut* **67** 1716-1725. (2018)
84. Catterson JH, *et al.* Short-Term, Intermittent Fasting Induces Long-Lasting Gut Health and TOR-Independent Lifespan Extension. *Curr Biol* **28** 1714-1724.e1714. (2018)
85. Li GL, *et al.* Intermittent Fasting Promotes White Adipose Browning and Decreases Obesity by Shaping the Gut Microbiota. *Cell Metab* **26** 672-685.e674. (2017)
86. Olson CA, *et al.* The Gut Microbiota Mediates the Anti-Seizure Effects of the Ketogenic Diet. *Cell* **173** 1728-+. (2018)
87. Lindefeldt M, *et al.* The ketogenic diet influences taxonomic and functional composition of the gut microbiota in children with severe epilepsy. *Npj Biofilms and Microbiomes* **5**. (2019)
88. Bárcena C, *et al.* Healthspan and lifespan extension by fecal microbiota transplantation into progeroid mice. *Nat Med*; 2019.
89. Barton W, *et al.* The microbiome of professional athletes differs from that of more sedentary subjects in composition and particularly at the functional metabolic level. *Gut* **67** 625-633. (2018)

90. Davis GR, Santa Ana CA, Morawski SG, Fordtran JS. Permeability Characteristics of Human Jejunum, Ileum, Proximal Colon and Distal Colon: Results of Potential Difference Measurements and Unidirectional Fluxes. *Gastroenterology* **83** 844-850. (1982)
91. Ungell AL, Nylander S, Bergstrand S, Sjoberg A, Lennernas H. Membrane transport of drugs in different regions of the intestinal tract of the rat. *J Pharm Sci* **87** 360-366. (1998)
92. Vertzoni M, *et al.* Impact of regional differences along the gastrointestinal tract of healthy adults on oral drug absorption: An UNGAP review. *Eur J Pharm Sci* **134** 153-175. (2019)
93. Bajka BH, Rigby NM, Cross KL, Macierzanka A, Mackie AR. The influence of small intestinal mucus structure on particle transport *ex vivo*. *Colloids and Surfaces B-Biointerfaces* **135** 73-80. (2015)
94. Johansson MEV, Larsson JMH, Hansson GC. The two mucus layers of colon are organized by the MUC2 mucin, whereas the outer layer is a legislator of host-microbial interactions. *Proc Natl Acad Sci USA* **108** 4659-4665. (2011)
95. Teubl BJ, *et al.* The oral cavity as a biological barrier system: Design of an advanced buccal *in vitro* permeability model. *Eur J Pharm Biopharm* **84** 386-393. (2013)
96. Winne D. Dependence of intestinal-absorption *in vivo* on unstirred layer. *Naunyn-Schmiedeberg's Archives of Pharmacology* **304** 175-181. (1978)
97. Masaoka Y, Tanaka Y, Kataoka M, Sakuma S, Yamashita S. Site of drug absorption after oral administration: Assessment of membrane permeability and luminal concentration of drugs in each segment of gastrointestinal tract. *Eur J Pharm Sci* **29** 240-250. (2006)
98. Sharma A, Buschmann MM, Gilbert JA. Pharmacomicrobiomics: The Holy Grail to Variability in Drug Response? *Clin Pharmacol Ther* doi:10.1002/cpt.1437. (2019)
99. Wilkinson GR. Drug metabolism and variability among patients in drug response. *New England Journal of Medicine* **352** 2211-2221. (2005)
100. Iswandana R, *et al.* Regional Differences in Human Intestinal Drug Metabolism. *Drug Metab Disposition* **46** 1879-1885. (2018)
101. Thiele I, Clancy CM, Heinken A, Fleming RMT. Quantitative systems pharmacology and the personalized drug-microbiota-diet axis. *Curr Opin Syst Biol* **4** 43-52. (2017)
102. Klaassen CD, Cui JY. Review: Mechanisms of How the Intestinal Microbiota Alters the Effects of Drugs and Bile Acids. *Drug Metab Disposition* **43** 1505-1521. (2015)
103. Wilson ID. Drugs, bugs, and personalized medicine: Pharmacometabonomics enters the ring. *Proc Natl Acad Sci USA* **106** 14187-14188. (2009)
104. Magnusdottir S, *et al.* Generation of genome-scale metabolic reconstructions for 773 members of the human gut microbiota. *Nat Biotechnol* **35** 81-89. (2017)
105. Wilson ID, Nicholson JK. Gut microbiome interactions with drug metabolism, efficacy, and toxicity. *Translational Research* **179** 204-222. (2017)

106. Chen HW, *et al.* A Forward Chemical Genetic Screen Reveals Gut Microbiota Metabolites That Modulate Host Physiology. *Cell* **177** 1217-1231.e1218. (2019)
107. Nieminen TH, *et al.* Grapefruit Juice Enhances the Exposure to Oral Oxycodone. *Basic Clin Pharmacol Toxicol* **107** 782-788. (2010)
108. Nichols RG, Peters JM, Patterson AD. Interplay Between the Host, the Human Microbiome, and Drug Metabolism. *Human Genomics* **13**. (2019)
109. Boettcher C, Fellermeier M, Boettcher C, Drager B, Zenk MH. How human neuroblastoma cells make morphine. *Proc Natl Acad Sci* **102** 8495-8500. (2005)
110. Laux-Biehlmann A, Mouheiche J, Vérièpe J, Goumon Y. Endogenous morphine and its metabolites in mammals: History, synthesis, localization and perspectives. *Neuroscience* **233** 95-117. (2013)
111. Palsson BO. *Systems biology: Properties of reconstructed networks*. Cambridge University Press: Cambridge; New York, 2006.
112. Bloomingdale P, *et al.* Quantitative systems toxicology. *Current Opinion in Toxicology* **4** 79-87. (2017)
113. Kitano H. Computational systems biology. *Nature* **420** 206-210. (2002)
114. Amemiya T, *et al.* Elucidation of the molecular mechanisms underlying adverse reactions associated with a kinase inhibitor using systems toxicology. *Npj Systems Biology and Applications* **1**. (2015)
115. Norris JL, *et al.* Integrated, high-throughput, multiomics platform enables data-driven construction of cellular responses and reveals global drug mechanisms of action. *J Proteome Res* **16** 1364-1375. (2017)
116. Madireddy L, *et al.* A systems biology approach uncovers cell-specific gene regulatory effects of genetic associations in multiple sclerosis. *Nat Commun* **10**. (2019)
117. Himmelstein DS, *et al.* Systematic integration of biomedical knowledge prioritizes drugs for repurposing. *Elife* **6**. (2017)
118. Himmelstein DS, Baranzini SE. Heterogeneous Network Edge Prediction: A Data Integration Approach to Prioritize Disease-Associated Genes. *PLoS Computational Biology* **11**. (2015)
119. Sweeney LM, Shuler ML, Babish JG, Ghanem A. A cell culture analogue of rodent physiology: Application to naphthalene toxicology. *Toxicol In Vitro* **9** 307-316. (1995)
120. Ghanem A, Shuler ML. Combining cell culture analogue reactor designs and PBPK models to probe mechanisms of naphthalene toxicity. *Biotechnology Progress* **16** 334-345. (2000)
121. Park TH, Shuler ML. Integration of Cell Culture and Microfabrication Technology. *Biotechnology Progress* **19** 243-253. (2003)

122. Harris SG, Shuler ML. Growth of endothelial cells on microfabricated silicon nitride membranes for an in vitro model of the blood-brain barrier. *Biotechnology and Bioprocess Engineering* **8** 246-251. (2003)
123. Shayan G, Shuler ML, Shusta E, Ober CK, Lee KH. New in vitro model of the blood-brain barrier: From nanofabrication and the culture of murine brain microvascular endothelial cells to drug transport. *Abstracts of Papers of the American Chemical Society* **238** Abstract 397-MEDI. (2009)
124. Mahler GJ, Esch MB, Glahn RP, Shuler ML. Characterization of a gastrointestinal tract microscale cell culture analog used to predict drug toxicity. *Biotechnology and Bioengineering* **104** 193-205. (2009)
125. Shuler ML, Esch MB. Body-on-a chip: Using microfluidic systems to predict human responses to drugs. *Pure And Applied Chemistry* **82** 1635-1645. (2010)
126. Sung JH, Esch MB, Shuler ML. Integration of in silico and in vitro platforms for pharmacokinetic-pharmacodynamic modeling. *Expert Opin Drug Metab Toxicol* **6** 1063-1081. (2010)
127. Sung JH, Kam C, Shuler ML. A microfluidic device for a pharmacokinetic-pharmacodynamic (PK-PD) model on a chip. *Lab Chip* **10** 446-455. (2010)
128. Shuler M. Modeling Life. *Ann Biomed Eng* **40** 1399-1407. (2012)
129. Esch MB, *et al.* On chip porous polymer membranes for integration of gastrointestinal tract epithelium with microfluidic 'body-on-a-chip' devices. *Biomedical Microdevices* **14** 895-906. (2012)
130. Sung JH, *et al.* Microfabricated mammalian organ systems and their integration into models of whole animals and humans. *Lab Chip* **13** 1201-1212. (2013)
131. Esch MB, *et al.* Multi-cellular 3D human primary liver cell culture elevates metabolic activity under fluidic flow. *Lab Chip* **15** 2269-2277. (2015)
132. Oleaga C, *et al.* Multi-Organ toxicity demonstration in a functional human in vitro system composed of four organs. *Sci Rep* **6**. (2016)
133. Esch MB, Ueno H, Applegate DR, Shuler ML. Modular, pumpless body-on-a-chip platform for the co-culture of GI tract epithelium and 3D primary liver tissue. *Lab Chip* **16** 2719-2729. (2016)
134. McAleer CW, *et al.* On the potential of in vitro organ-chip models to define temporal pharmacokinetic-pharmacodynamic relationships. *Sci Rep* **9**. (2019)
135. Viravaidya K, Sin A, Shuler ML. Development of a microscale cell culture analog to probe naphthalene toxicity. *Biotechnology Progress* **20** 316-323. (2004)

136. Sung JH, Shuler ML. A micro cell culture analog (mu CCA) with 3-D hydrogel culture of multiple cell lines to assess metabolism-dependent cytotoxicity of anti-cancer drugs. *Lab Chip* **9** 1385-1394. (2009)
137. van der Meer AD, van den Berg A. Organs-on-chips: breaking the in vitro impasse. *Integrative Biology* **4** 461-470. (2012)
138. Huh D, Hamilton GA, Ingber DE. From 3D cell culture to organs-on-chips. *Trends Cell Biol* **21** 745-754. (2011)
139. Esch MB, King TL, Shuler ML. The Role of Body-on-a-Chip Devices in Drug and Toxicity Studies. *Annu Rev Biomed Eng* **13** 55-72. (2011)
140. Moraes C, Mehta G, Leshner-Perez SC, Takayama S. Organs-on-a-Chip: A Focus on Compartmentalized Microdevices. *Ann Biomed Eng* **40** 1211-1227. (2012)
141. Huh D, Torisawa YS, Hamilton GA, Kim HJ, Ingber DE. Microengineered physiological biomimicry: Organs-on-Chips. *Lab Chip* **12** 2156-2164. (2012)
142. Cheng CS, Davis BNJ, Maddan L, Bursac N, Truskey GA. Physiology and metabolism of tissue-engineered skeletal muscle. *Exp Biol Med* **239** 1203-1214. (2014)
143. Marx U, *et al.* Biology-Inspired Microphysiological System Approaches to Solve the Prediction Dilemma of Substance Testing. *ALTEX Altern Anim Ex* **33** 272-321. (2016)
144. Jang KJ, *et al.* Human kidney proximal tubule-on-a-chip for drug transport and nephrotoxicity assessment. *Integrative Biology* **5** 1119-1129. (2013)
145. Jellali R, Paullier P, Fleury MJ, Leclerc E. Liver and kidney cells cultures in a new perfluoropolyether biochip. *Sensors and Actuators B-Chemical* **229** 396-407. (2016)
146. Paoli R, Samitier J. Mimicking the Kidney: A Key Role in Organ-on-Chip Development. *Micromachines* **7**. (2016)
147. Chang S-Y, *et al.* Human liver-kidney model elucidates the mechanisms of aristolochic acid nephrotoxicity. *JCI Insight* **2**. (2017)
148. Kim HJ, Huh D, Hamilton G, Ingber DE. Human gut-on-a-chip inhabited by microbial flora that experiences intestinal peristalsis-like motions and flow. *Lab Chip* **12** 2165-2174. (2012)
149. Kim HJ, Ingber DE. Gut-on-a-Chip microenvironment induces human intestinal cells to undergo villus differentiation. *Integrative Biology* **5** 1130-1140. (2013)
150. Blutt SE, *et al.* Gastrointestinal microphysiological systems. *Exp Biol Med* **242** 1633-1642. (2017)
151. Kasendra M, *et al.* Development of a primary human Small Intestine-on-a-Chip using biopsys-derived organoids. *Sci Rep* **8**. (2018)

152. Bein A, *et al.* Microfluidic Organ-on-a-Chip Models of Human Intestine. *Cell Mol Gastroenterol Hepatol* **5** 659-668. (2018)
153. Sivaraman A, *et al.* A microscale in vitro physiological model of the liver: Predictive screens for drug metabolism and enzyme induction. *Curr Drug Metab* **6** 569-591. (2005)
154. Domansky K, *et al.* Perfused multiwell plate for 3D liver tissue engineering. *Lab Chip* **10** 51-58. (2010)
155. Bhushan A, *et al.* Towards a three-dimensional microfluidic liver platform for predicting drug efficacy and toxicity in humans. *Stem Cell Res Ther* **4** (Supp.1) Article S16. (2013)
156. Li X, George SM, Verneti L, Gough AH, Taylor DL. A glass-based, continuously zoned and vascularized human liver acinus microphysiological system (vLAMPS) designed for experimental modeling of diseases and ADME/TOX. *Lab Chip* **18** 2614-2631. (2018)
157. Verneti LA, *et al.* A human liver microphysiology platform for investigating physiology, drug safety, and disease models. *Exp Biol Med* **241** 101-114. (2016)
158. Prodanov L, *et al.* Long-term maintenance of a microfluidic 3D human liver sinusoid. *Biotechnology and Bioengineering* **113** 241-246. (2016)
159. Bhise NS, *et al.* A liver-on-a-chip platform with bioprinted hepatic spheroids. *Biofabrication* **8**. (2016)
160. Bavli D, *et al.* Real-time monitoring of metabolic function in liver-on-chip microdevices tracks the dynamics of mitochondrial dysfunction. *Proc Natl Acad Sci USA* **113** E2231-E2240. (2016)
161. Maschmeyer I, *et al.* A four-organ-chip for interconnected long-term co-culture of human intestine, liver, skin and kidney equivalents. *Lab Chip* **15** 2688-2699. (2015)
162. Maschmeyer I, *et al.* Chip-based human liver-intestine and liver-skin co-cultures - A first step toward systemic repeated dose substance testing in vitro. *Eur J Pharm Biopharm* **95** 77-87. (2015)
163. Wagner I, *et al.* A dynamic multi-organ-chip for long-term cultivation and substance testing proven by 3D human liver and skin tissue co-culture. *Lab Chip* **13** 3538-3547. (2013)
164. Achyuta AKH, *et al.* A modular approach to create a neurovascular unit-on-a-chip. *Lab Chip* **13** 542-553. (2013)
165. Griep LM, *et al.* BBB ON CHIP: Microfluidic platform to mechanically and biochemically modulate blood-brain barrier function. *Biomedical Microdevices* **15** 145-150. (2013)
166. Prabhakarandian B, *et al.* SyM-BBB: A Microfluidic Blood Brain Barrier Model. *Lab Chip* **13** 1093-1101. (2013)
167. Brown JA, *et al.* Recreating blood-brain barrier physiology and structure on chip: A novel neurovascular microfluidic bioreactor. *Biomicrofluidics* **9**. (2015)

168. Brown JA, *et al.* Metabolic Consequences of Interleukin-6 Challenge in Developing Neurons and Astroglia. *J Neuroinflammation* **11**. (2014)
169. Pamies D, Hartung T, Hogberg HT. Biological and medical applications of a brain-on-chip. *Exp Biol Med* **239** 1096-1107. (2014)
170. Park J, *et al.* Three-dimensional brain-on-a-chip with an interstitial level of flow and its application as an in vitro model of Alzheimer's disease. *Lab Chip* **15** 141-150. (2015)
171. Sellgren KL, Hawkins BT, Grego S. An optically transparent membrane supports shear stress studies in a three-dimensional microfluidic neurovascular unit model. *Biomicrofluidics* **9** Article 061102. (2015)
172. Deosarkar SP, *et al.* A Novel Dynamic Neonatal Blood-Brain Barrier on a Chip. *PLoS One* **10** e0142725. (2015)
173. Brown JA, *et al.* Metabolic consequences of inflammatory disruption of the blood-brain barrier in an organ-on-chip model of the human neurovascular unit. *J Neuroinflammation* **13**. (2016)
174. Kilic O, *et al.* Brain-on-a-chip model enables analysis of human neuronal differentiation and chemotaxis. *Lab Chip* **16** 4152-4162. (2016)
175. Dauth S, *et al.* Neurons derived from different brain regions are inherently different in vitro: a novel multiregional brain-on-a-chip. *J Neurophysiol* **117** 1320-1341. (2017)
176. Koo Y, Hawkins BT, Yun Y. Three-dimensional (3D) tetra-culture brain on chip platform for organophosphate toxicity screening. *Sci Rep* **8**. (2018)
177. Vatine GD, *et al.* Human iPSC-Derived Blood-Brain Barrier Chips Enable Disease Modeling and Personalized Medicine Applications. *Cell Stem Cell* **24** 995-1005. (2019)
178. Park T-E, *et al.* Hypoxia-enhanced Blood-Brain Barrier Chip recapitulates human barrier function and shuttling of drugs and antibodies. *Nat Commun* **10**. (2019)
179. Zhang B, Radisic M. Organ-on-a-Chip devices advance to market. *Lab Chip* **17** 2395-2420. (2017)
180. Markov DA, Lu JQ, Samson PC, Wikswo JP, McCawley LJ. Thick-tissue bioreactor as a platform for long-term organotypic culture and drug delivery. *Lab Chip* **12** 4560-4568. (2012)
181. Wang YQ, Wang L, Guo YQ, Zhu YJ, Qin JH. Engineering stem cell-derived 3D brain organoids in a perfusable organ-on-a-chip system. *Rsc Advances* **8** 1677-1685. (2018)
182. Sato T, *et al.* Long-term Expansion of Epithelial Organoids From Human Colon, Adenoma, Adenocarcinoma, and Barrett's Epithelium. *Gastroenterology* **141** 1762-1772. (2011)
183. Onozato D, *et al.* Generation of Intestinal Organoids Suitable for Pharmacokinetic Studies from Human Induced Pluripotent Stem Cells. *Drug Metab Disposition* **46** 1572-1580. (2018)

184. Qian XY, *et al.* Brain-Region-Specific Organoids Using Mini-bioreactors for Modeling ZIKV Exposure. *Cell* **165** 1238-1254. (2016)
185. Skardal A, Shupe T, Atala A. Organoid-on-a-chip and body-on-a-chip systems for drug screening and disease modeling. *Drug Discov Today* **21** 1399-1411. (2016)
186. Friedman AA, Letai A, Fisher DE, Flaherty KT. Precision medicine for cancer with next-generation functional diagnostics. *Nat Rev Cancer* **15** 747-756. (2015)
187. Vlachogiannis G, *et al.* Patient-derived organoids model treatment response of metastatic gastrointestinal cancers. *Science* **359** 920-926. (2018)
188. Grassi L, *et al.* Organoids as a new model for improving regenerative medicine and cancer personalized therapy in renal diseases. *Cell Death Dis* **10**. (2019)
189. Shuford S, *et al.* Prospective Validation of an Ex Vivo, Patient-Derived 3D Spheroid Model for Response Predictions in Newly Diagnosed Ovarian Cancer. *Sci Rep* **9**. (2019)
190. Vunjak-Novakovic G, Bhatia S, Chen C, Hirschi K. HeLiVa platform: integrated heart-liver-vascular systems for drug testing in human health and disease. *Stem Cell Res Ther* **4** (Supp.1) Article S8. (2013)
191. Seol Y, *et al.* 3-D Bioprinting of Tissue Organoids for Body-on-a-Chip Drug Screening Platform. *Tissue EngPtA* **21** S369. (2015)
192. Xiao S, *et al.* A microfluidic culture model of the human reproductive tract and 28-day menstrual cycle. *Nat Commun* **8**. (2017)
193. Zhang YS, *et al.* Multisensor-integrated organs-on-chips platform for automated and continual in situ monitoring of organoid behaviors. *Proc Natl Acad Sci USA* **114** E2293-E2302. (2017)
194. Schimek K, *et al.* Integrating biological vasculature into a multi-organ-chip microsystem. *Lab Chip* **13** 3588-3598. (2013)
195. Edington CD, *et al.* Interconnected Microphysiological Systems for Quantitative Biology and Pharmacology Studies. *Sci Rep* **8**. (2018)
196. Chen WLK, *et al.* Integrated Gut/Liver Microphysiological Systems Elucidates Inflammatory Inter-Tissue Crosstalk. *Biotechnology and Bioengineering* **114** 2648-2659. (2017)
197. van Midwoud PM, Merema MT, Verpoorte E, Groothuis GM. A microfluidic approach for in vitro assessment of interorgan interactions in drug metabolism using intestinal and liver slices. *Lab Chip* **10** 2778-2786. (2010)
198. Maass C, *et al.* Establishing quasi-steady state operations of microphysiological systems (MPS) using tissue-specific metabolic dependencies. *Sci Rep* **8**. (2018)
199. Herland A, *et al.* Quantitative prediction of human pharmacokinetic responses to drugs via fluidically coupled vascularized organ chips. *Nat Biomed Eng* **4** 421-436. (2020)



200. Novak R, *et al.* Robotic fluidic coupling and interrogation of multiple vascularized organ chips. *Nat Biomed Eng* **4** 407-420. (2020)
201. Boeri L, *et al.* Advanced Organ-on-a-Chip Devices to Investigate Liver Multi-Organ Communication: Focus on Gut, Microbiota and Brain. *Bioengineering* **6**. (2019)
202. Logsdon AF, Erickson MA, Rhea EM, Salameh TS, Banks WA. Gut reactions: How the blood-brain barrier connects the microbiome and the brain. *Exp Biol Med* **243** 159-165. (2018)
203. Verneti L, *et al.* Functional Coupling of Human Microphysiology Systems: Intestine, Liver, Kidney Proximal Tubule, Blood-Brain Barrier and Skeletal Muscle. *Sci Rep* **7**. (2017)
204. Maoz BM, *et al.* A linked organ-on-chip model of the human neurovascular unit reveals the metabolic coupling of endothelial and neuronal cells. *Nat Biotechnol* **36** 865-874. (2018)
205. Wikswo J, *et al.* Scaling and systems biology for integrating multiple organs-on-a-chip. *Lab Chip* **13** 3496-3511. (2013)
206. Wikswo JP, *et al.* Engineering Challenges for Instrumenting and Controlling Integrated Organ-on-Chip Systems. *IEEE Transactions on Biomedical Engineering* **60** 682-690. (2013)
207. Fischer U, *et al.* Does Physiological Blood-Glucose Control Require An Adaptive-Control Strategy. *IEEE Transactions on Biomedical Engineering* **34** 575-582. (1987)
208. Ma B, Zhang G, Qin J, Lin B. Characterization of drug metabolites and cytotoxicity assay simultaneously using an integrated microfluidic device. *Lab Chip* **9** 232-238. (2009)
209. Li AP, Bode C, Sakai Y. A novel in vitro system, the integrated discrete multiple organ cell culture (IdMOC) system, for the evaluation of human drug toxicity: comparative cytotoxicity of tamoxifen towards normal human cells from five major organs and MCF-7 adenocarcinoma breast cancer cells. *Chemico-Biological Interactions* **150** 129-136. (2004)
210. Wu MH, Huang SB, Lee GB. Microfluidic cell culture systems for drug research. *Lab Chip* **10** 939-956. (2010)
211. Lombardi D, Dittrich PS. Advances in microfluidics for drug discovery. *Expert Opinion on Drug Discovery* **5** 1081-1094. (2010)
212. Ghaemmaghami AM, Hancock MJ, Harrington H, Kaji H, Khademhosseini A. Biomimetic tissues on a chip for drug discovery. *Drug Discov Today* **17** 173-181. (2012)
213. Wheeler SE, *et al.* All-human microphysical model of metastasis therapy. *Stem Cell Res Ther* **4** (Supp.1) Article S11. (2013)
214. Clark AM, *et al.* A microphysiological system model of therapy for liver micrometastases. *Exp Biol Med* **239** 1170-1179. (2014)

215. Yu J, *et al.* Quantitative Systems Pharmacology Approaches Applied to Microphysiological Systems (MPS): Data Interpretation and Multi-MPS Integration. *CPT Pharmacometrics Syst Pharmacol*, **4** 585-594. (2015)
216. Prantil-Baun R, *et al.* Physiologically Based Pharmacokinetic and Pharmacodynamic Analysis Enabled by Microfluidically Linked Organs-on-Chips. *Annual Review of Pharmacology and Toxicology* **58** 37-64. (2018)
217. Taylor DL, *et al.* Harnessing Human Microphysiology Systems as Key Experimental Models for Quantitative Systems Pharmacology. In: Barrett JE, Page CP, Michel MC, editors. *Concepts and Principles of Pharmacology: 100 Years of the Handbook of Experimental Pharmacology*: Springer International Publishing; 2019. pp. 327-367.
218. Koedooder R, *et al.* Identification and evaluation of the microbiome in the female and male reproductive tracts. *Hum Reprod Update* **25** 298-325. (2019)
219. Wolfe AJ, Brubaker L. Urobiome updates: advances in urinary microbiome research. *Nature Reviews Urology* **16** 73-74. (2019)
220. Markowski MC, *et al.* The Microbiome and Genitourinary Cancer: A Collaborative Review. *Eur Urol* **75** 637-646. (2019)
221. Schoenmakers S, Steegers-Theunissen R, Faas M. The matter of the reproductive microbiome. *Obstetric Medicine* **12** 107-115. (2018)
222. Mändar R. Microbiota of male genital tract: Impact on the health of man and his partner. *Pharmacol Res* **69** 32-41. (2013)
223. Gerber D, Forster CS, Hsieh M. The Role of the Genitourinary Microbiome in Pediatric Urology: a Review. *Curr Urol Rep* **19**. (2018)
224. Aagaard K, *et al.* The Placenta Harbors a Unique Microbiome. *Sci Transl Med* **6** Article 237ra265. (2014)
225. Jasarevic E, Howerton CL, Howard CD, Bale TL. Alterations in the Vaginal Microbiome by Maternal Stress Are Associated With Metabolic Reprogramming of the Offspring Gut and Brain. *Endocrinology* **156** 3265-3276. (2015)
226. De Goffau MC, *et al.* Human placenta has no microbiome but can contain potential pathogens. *Nature* **572** 329-334. (2019)
227. Zhu Y, *et al.* Placental Barrier-on-a-Chip: Modeling Placental Inflammatory Responses to Bacterial Infection. *ACS Biomater Sci* **4** 3356-3363. (2018)
228. Gnecco JS, *et al.* Instrumenting a Fetal Membrane on a Chip as Emerging Technology for Preterm Birth Research. *Curr Pharm Des* **23** 6115-6124. (2017)
229. Bruner-Tran KL, *et al.* Exposure to the environmental endocrine disruptor TCDD and human reproductive dysfunction: Translating lessons from murine models. *Reprod Toxicol* **68** 59-71. (2017)

230. Hutson MS, *et al.* Organs-on-Chips as Bridges for Predictive Toxicology. *Applied In Vitro Toxicology* **2** 97-102. (2016)
231. Laronda MM, Burdette JE, Kim JJ, Woodruff TK. Recreating the female reproductive tract in vitro using iPSC technology in a linked microfluidics environment. *Stem Cell Res Ther* **4 (Supp.1)** Article S13. (2013)
232. Baker JM, Chase DM, Herbst-Kralovetz MM. Uterine Microbiota: Residents, Tourists, or Invaders? *Front Immunol* **9**. (2018)
233. Wilkinson EM, Ilhan ZE, Herbst-Kralovetz MM. Microbiota–drug interactions: Impact on metabolism and efficacy of therapeutics. *Maturitas* **112** 53-63. (2018)
